# Supplementary material for: Tumor marker elevations in chronic kidney disease: a retrospective study
Source: PeerJ. 2025 Apr 3;13:e19240. doi: 10.7717/peerj.19240 (PMC11972561; doi:10.7717/peerj.19240)
Supplement: Supplemental Information 1 [file peerj-13-19240-s001.xlsx]

## Sheet: control
[sex]	urinary protein	group	sex	age	stage	BUN	Cr	urine specific gravity	CEA	CA125	CA153	CA199	CA724	NSE	gastrin	HE4	[Plasma total protein]	[albumin]	[apolipoprotein]	[potassium ion]	[sodion]	[anion gap]	[WBC]	[RBC]	[Hb]	[Urine red blood cell count]	Urinary leukocyte	[urinary cast]	[PLT]
male	0	2	1	49	0	3.95	66.9	1.005	2.020	11.320		9.220	4.570	13.620	34.58		77.9	49.9	0.61	3.89	143.0	21.29	6.3	5.17	156	1.11	0.56	0.00	213
male	0	2	1	48	0	6.20	68.0	1.020	0.991	4.700		5.920	2.940	10.440	20.41		71.8	47.2	0.50	4.01	141.0	17.01	5.3	4.65	132	17.79	12.23	0.64	286
male	0	2	1	29	0	4.20	74.0	1.015	1.440			5.590		12.880	24.85		77.8	52.0	1.14	4.07	141.0	20.47	6.9	4.94	154	3.34	6.67	0.00	300
male	0	2	1	30	0	6.00	93.0	1.015	2.860			9.160	2.170	10.100	47.43		78.2	49.2	0.69	4.14	140.0	18.84	6.9	5.06	160	1.67	8.34	0.25	249
male	0	2	1	23	0	4.32	74.7	1.015	1.880			4.910		9.650	31.73		76.7	50.9	0.68	4.12	141.9	18.32	4.9	4.98	153	6.12	5.56	0.38	253
male	0	2	1	27	0	4.59	80.7	1.010	1.560			9.830		13.050	44.48		78.1	49.6	0.62	4.11	143.6	17.51	5.3	5.66	167	2.78	2.78	0.12	277
male	0	2	1	33	0	4.77	80.9	1.020	1.100			8.720	1.790	9.330	43.64		73.1	40.7	0.95	3.91	139.2	15.41	5.9	5.26	156	4.45	2.78	0.00	237
male	0	2	1	45	0	4.70	71.0	1.025	3.260	9.500		23.630	4.310	16.030	40.95		78.8	50.4	1.08	4.26	141.0	19.16	5.1	5.47	163	4.45	22.24	0.38	277
male	0	2	1	31	0	6.50	83.0	1.020	1.425	7.010		0.600	1.740		45.81		73.1	53.1	0.56	4.31	143.0	20.11	3.7	5.01	145	3.35	2.17	0.12	263
male	0	2	1	50	0	6.00	73.0	1.005	1.550			9.500	3.160	20.820	35.30		73.9	46.3	1.01	4.55	139.0	22.35	8.3	4.40	144	3.12	1.87	0.15	240
male	0	2	1	48	0	4.60	91.0	1.025	1.070	48.490		10.560	1.630	10.760	38.19		73.1	45.0	0.46	4.12	141.0	14.72	4.1	4.34	144	16.68	7.78	0.64	222
male	0	2	1	48	0	5.38	67.0	1.015	2.040			7.610	3.430		36.67		72.9	46.0	1.06	4.90	140.6	15.50	5.6	4.90	151	0.00	0.00	0.00	272
male	0	2	1	27	0	5.30	86.0	1.010	2.660			7.530		12.180	32.85		72.5	47.2	0.83	4.43	140.0	18.03	5.6	5.49	162	2.22	2.22	0.12	234
male	0	2	1	27	0	4.74	67.5	1.025	0.766			3.480		11.170	38.14		76.2	49.7	0.65	4.10	141.7	18.80	6.7	5.21	160	0.56	2.78	0.12	233
male	0	2	1	33	0	6.32	91.1	1.020	0.767			6.610	0.960	9.840	39.78		72.1	46.9	0.79	4.14	140.6	14.94	6.3	4.93	153	3.89	1.11	0.12	255
male	0	2	1	37	0	4.60	69.0	1.020	1.260			7.790	2.410	11.020	39.06		77.9	54.0	0.75	4.49	139.9	19.19	7.2	4.90	137	0.56	0.56	0.00	261
male	0	2	1	31	0	4.53	73.2	1.025	0.625			11.360	0.597	11.540	40.41		71.3	48.5	0.94	4.06	140.0	20.26	6.3	5.25	161	0.00	2.78	0.00	304
male	0	2	1	40	0	6.10	67.0	1.025	1.690			4.550	20.700		43.62		76.5	47.7	0.83	4.60	140.0	18.40	8.9	4.65	144	2.22	2.78	0.38	342
male	0	2	1	42	0	4.43	63.3	1.015	1.350	4.360		2.960	2.180	9.960	36.75		75.0	49.8	0.64	3.96	139.3	19.06	7.3	5.05	130	1.15	7.55	0.51	235
male	0	2	1	30	0	5.13	80.7	1.015	1.590			11.140	0.947	12.970	25.98		80.8	50.3	0.70	4.35	142.2	16.25	7.1	5.29	159	2.22	1.11	0.12	266
male	0	2	1	23	0	4.48	82.7	1.010	1.590			2.030		15.490	57.06		75.9	44.5	0.74	3.74	137.8	15.44	6.9	4.87	167	0.56	1.11	0.00	261
male	0	2	1	30	0	5.28	81.3	1.005	1.100			3.490	1.800	13.910	32.44		72.1	48.7	0.61	4.56	141.1	19.76	6.1	5.04	135	1.11	2.78	0.12	174
male	0	2	1	49	0	3.40	81.0	1.015	1.310			6.250	10.280	9.820	31.55		70.4	46.8	0.73	4.23	141.8	10.73	7.8	4.90	152	4.45	3.34	0.00	252
male	0	2	1	40	0	4.30	85.0	1.005	0.790	9.360		18.230	13.680	12.310	51.29		73.5	46.7	0.79	4.10	142.0	12.00	7.1	4.83	145	0.56	0.56	0.00	207
male	0	2	1	37	0	5.00	93.0	1.005	2.500	10.850	5.640	17.020	1.120	12.010	45.71		72.0	45.6	1.25	4.45	140.0	14.25	6.9	5.22	159	1.11	1.67	0.00	215
male	0	2	1	27	0	4.40	86.0	1.020	2.670	16.560		13.700	0.732	14.150	48.42		84.5	52.6	0.91	4.09	143.5	22.29	7.9	5.49	161	0.56	1.11	0.12	200
male	0	2	1	26	0	3.71	70.9	1.005	0.736			5.380		11.280	26.72		75.4	52.3	0.90	4.45	139.5	18.25	7.1	5.27	158	0.56	2.78	0.00	264
male	0	2	1	27	0	4.20	73.0	1.025	0.968			1.270		14.930	18.74		72.6	50.4	0.65	3.85	140.0	19.85	5.8	4.86	157	11.68	6.67	0.76	186
male	0	2	1	49	0	5.30	73.0	1.010	1.340	9.660	8.600	8.300	2.080	9.280	39.02		75.5	48.2	0.86	4.08	140.0	21.48	6.8	5.19	155	5.56	2.22	0.38	175
male	0	2	1	40	0	5.20	88.0	1.020	2.210	3.000		20.830	0.798	9.260	41.12		72.7	51.1	0.66	3.98	142.0	20.48	8.1	4.77	149	15.01	3.34	0.38	273
male	0	2	1	28	0	4.60	90.0	1.010	2.910			9.700		11.080	62.91		71.3	49.2	0.41	4.24	140.8	15.04	7.6	5.37	154	1.11	2.22	0.00	247
male	0	2	1	27	0	4.40	80.1	1.025	2.080			0.600		13.490	28.14		79.8	51.6	1.39	3.96	142.8	16.56	5.2	5.56	160	3.34	4.45	0.64	256
male	0	2	1	27	0	4.16	89.0	1.020	2.860			7.810		15.030	31.83		76.7	49.0	0.67	4.19	139.3	18.89	7.0	5.65	169	3.34	2.78	0.00	276
male	0	2	1	41	0	4.08	65.0	1.015	1.300	7.230		6.400	7.050	15.750	44.51		77.5	48.9	0.72	4.30	138.8	15.10	4.7	4.65	140	45.5	2.45	0.00	295
male	0	2	1	35	0	4.80	73.0	1.025	2.740	9.270		13.000	1.150	14.300	52.13		73.5	46.3	1.00	4.24	141.0	18.24	9.9	5.05	146	2.78	6.67	0.00	282
male	0	2	1	34	0	4.30	68.0	1.010	1.950			5.150	1.650	13.100	39.13		76.8	53.0	0.48	4.54	139.1	16.74	5.6	5.55	164	11.68	2.78	0.12	249
male	0	2	1	26	0	4.70	64.0	1.015	0.614			6.570		14.790	36.37		77.9	52.5	0.74	3.75	142.0	18.95	6.4	5.70	152	1.67	5.00	0.00	204
male	0	2	1	30	0	5.70	74.0	1.005	1.950	16.100		6.920	1.280	12.150	34.49		71.4	52.5	0.76	4.16	139.7	13.56	5.0	4.80	147	0.00	3.34	0.12	216
male	0	2	1	29	0	5.80	94.0	1.015	2.510			7.270		13.030	50.03		76.6	52.0	0.47	4.02	142.0	20.42	4.6	5.23	159	1.11	5.56	0.12	282
male	0	2	1	33	0	4.53	87.7	1.025	3.310			8.560	3.260	14.760	38.87		72.6	47.3	0.87	4.01	143.8	14.31	6.3	5.71	156	1.11	2.78	0.00	288
male	0	2	1	35	0	3.70	82.6	1.020	1.590			6.660	3.280	13.440	55.80		75.6	46.7	0.88	3.63	137.6	16.63	8.6	5.65	164	16.68	4.45	0.00	257
male	0	2	1	35	0	4.19	77.3	1.025	2.060			10.600	1.590	11.740	35.72		75.5	45.7	0.86	4.18	138.1	13.88	7.8	6.79	147	6.67	8.90	0.76	310
male	0	2	1	45	0	3.27	96.7	1.025	0.871	7.280		6.960	14.030	12.330	44.58		72.0	45.4	0.57	4.92	140.1	17.42	6.3	5.40	163	3.89	2.78	0.12	288
male	0	2	1	38	0	4.60	85.0	1.015	1.700			11.070	1.960	18.720	34.92		77.3	49.6	0.95	4.33	144.0	19.13	7.2	5.81	165	10.56	1.11	0.12	236
male	0	2	1	27	0	5.00	96.0	1.025	0.923	12.090		4.170	1.470	9.290	29.21		78.5	51.2	1.02	4.40	143.0	12.70	7.3	4.90	157	3.34	1.67	0.12	295
male	0	2	1	28	0	4.30	93.0	1.020	2.530	10.840		8.990	1.190	7.980	52.90		76.8	49.3	1.08	4.68	141.0	18.98	7.6	4.76	151	0.56	1.67	0.00	278
male	0	2	1	50	0	3.50	73.0	1.015	0.892	8.710		5.690	1.950	11.220	53.39		69.3	48.5	0.64	4.19	142.2	14.59	6.5	4.54	155	0.55	1.00	0.25	222
male	0	2	1	46	0	6.50	95.0	1.015	1.830	12.020	18.350	6.740	2.050	13.530	41.56		69.6	49.5	1.17	4.25	141.0	15.85	4.2	5.20	157	0.56	3.34	0.12	265
male	0	2	1	33	0	4.30	86.0	1.020	1.710			12.100	1.120	9.770	31.73		83.5	45.8	0.40	4.34	141.4	16.94	7.5	4.82	141	10.01	3.34	0.00	339
male	0	2	1	36	0	5.36	85.8	1.010	1.030			6.200	9.900	11.930	28.76		73.0	51.3	1.18	4.35	139.0	20.05	5.0	4.95	154	1.67	5.00	0.00	220
male	0	2	1	34	0	3.56	65.4	1.020	3.260			6.310	2.840	13.090	32.07		74.4	49.9	0.63	3.86	142.4	19.06	8.8	5.41	165	5.56	2.22	0.25	217
male	0	2	1	36	0	6.30	77.0	1.025	0.746			7.800	0.946	11.350	46.45		75.2	52.7	0.81	4.10	139.8	18.00	5.5	5.15	151	8.34	2.78	0.25	278
male	0	2	1	38	0	5.30	94.0	1.015	2.100			6.740	0.929	10.270	48.65		68.9	47.4	0.51	4.45	142.0	16.65	4.7	5.26	157	9.45	3.34	0.25	209
male	0	2	1	40	0	3.80	82.0	1.015	1.320	4.360		4.260	0.878	15.380	27.55		73.0	50.1	0.65	4.48	141.0	15.98	6.1	4.64	144	1.11	2.22	0.00	241
male	0	2	1	29	0	5.20	72.0	1.030	2.320			4.980		11.410	43.22		73.1	50.9	0.57	3.64	143.8	13.94	4.4	4.91	147	3.89	8.90	1.28	238
male	0	2	1	25	0	3.12	74.7	1.005	2.560			11.840		12.760	40.10		77.3	46.9	0.72	3.69	137.0	12.49	6.5	5.51	159	0.56	1.11	0.00	234
male	0	2	1	40	0	6.90	90.0	1.025	1.410	9.980		6.850	1.700	14.780	41.28		72.3	47.6	0.79	4.27	143.0	15.77	8.3	5.80	167	6.15	1.22	1.81	204
male	0	2	1	45	0	6.50	77.0	1.020	3.830	7.500		15.980	1.320	12.180	46.37		70.5	45.6	0.85	4.71	140.3	12.61	7.5	5.12	155	1.00	1.25	1.11	205
male	0	2	1	34	0	7.30	84.0	1.025	1.090	20.710		8.230	35.510	23.700	29.34		81.2	51.6	0.86	4.38	140.0	12.68	6.8	5.32	156	5.00	43.92	0.38	321
male	0	2	1	44	0	6.10	64.0	1.015	2.610	10.090		22.300	1.900	12.700	33.22		75.7	47.7	0.96	4.16	141.0	19.56	7.4	5.63	160	1.25	0.15	0.11	266
male	0	2	1	35	0	5.90	78.0	1.015	2.710	7.140		9.900	5.220	13.980	37.42		67.8	51.7	0.89	4.49	140.0	18.29	6.3	5.08	151	0.252	0.14	0.25	178
male	0	2	1	40	0	3.50	83.0	1.020	1.370			8.480	10.330	9.380	45.76		75.1	50.9	1.10	4.12	141.0	14.42	7.0	5.29	155	11.12	6.67	0.00	154
male	0	2	1	29	0	4.30	66.0	1.015	1.320	12.900		5.720	3.070	11.780	32.46		77.0	52.3	0.88	4.20	142.0	15.80	5.3	4.54	141	3.89	7.78	0.12	230
male	0	2	1	45	0	5.36	69.0	1.010	0.755			6.570	2.480		53.94		74.1	47.4	0.85	4.15	139.2	18.25	4.3	5.08	164	0.00	0.00	0.00	288
male	0	2	1	29	0	3.50	77.0	1.015	0.753			9.190		8.320	41.12		69.5	48.3	0.70	4.30	138.4	19.30	6.7	5.05	153	0.56	3.34	0.12	315
male	0	2	1	27	0	3.72	79.0	1.015	1.160			4.670		11.100	34.42		71.8	49.5	0.91	3.89	139.7	19.49	6.6	5.70	174	5.00	3.34	0.00	198
male	0	2	1	40	0	4.60	80.0	1.005	1.970	8.700		1.550	2.440	14.280	39.10		72.9	47.5	0.93	3.99	141.9	13.19	6.2	5.03	156	0.56	10.01	0.12	222
male	0	2	1	43	0	6.40	83.0	1.015	1.350	12.480		1.260	1.320	12.090	34.13		70.0	49.8	0.96	3.87	141.0	14.67	6.7	5.01	163	3.11	1.22	0.10	249
male	0	2	1	24	0	4.80	72.0	1.015	0.472	6.840		4.300	1.050	13.230	36.34		70.5	52.8	0.80	4.01	141.0	22.31	6.5	5.15	156	1.67	3.89	0.00	216
male	0	2	1	33	0	3.80	73.0	1.025	1.050	9.160		7.840	3.300	9.760	33.58		76.5	51.3	0.91	4.16	142.0	16.36	5.0	4.74	147	4.45	2.78	0.12	205
male	0	2	1	49	0	4.79	69.3	1.025	2.590	7.820		10.720	1.050	12.390	34.55		71.4	46.4	1.29	4.75	139.0	16.45	9.1	5.58	166	2.78	1.67	0.00	242
male	0	2	1	26	0	4.50	81.3	1.015	0.737			2.740		11.980	28.79		69.0	45.9	0.45	3.52	140.2	14.22	8.0	5.76	172	3.12	1.00	0.12	224
male	0	2	1	28	0	5.43	72.5	1.010	1.070			3.460		13.970	30.21		77.9	46.8	1.52	3.91	138.8	14.31	7.7	5.34	156	3.89	2.22	0.38	324
male	0	2	1	28	0	3.03	81.2	1.005	3.790			8.150		13.560	59.69		78.7	51.6	0.41	3.96	136.7	16.36	7.0	5.51	156	4.45	1.67	0.00	208
male	0	2	1	28	0	6.50	93.2	1.015	0.628			5.580		11.690	44.28		75.0	44.8	1.00	4.12	140.8	19.12	7.7	5.80	166	29.47	2.22	0.00	254
male	0	2	1	50	0	5.70	89.0	1.025	1.990	5.310		11.150	2.240	11.720	65.76		79.7	49.7	0.50	4.97	140.3	18.97	5.7	5.14	165	2.78	7.23	0.12	253
male	0	2	1	36	0	5.10	86.0	1.010	1.360			8.140	0.963	8.360	43.02		76.9	50.5	0.58	3.83	140.0	18.33	4.3	4.98	155	1.67	2.22	0.12	175
male	0	2	1	26	0	5.60	89.0	1.020	3.170			8.100		13.800	35.54		72.5	49.3	0.50	4.15	142.0	19.35	5.5	4.84	152	11.68	2.22	0.00	188
male	0	2	1	36	0	4.03	67.6	1.010	2.740			9.250	1.100	9.690	25.68		73.9	47.2	1.58	4.56	137.5	15.06	6.1	5.02	153	0.56	2.22	0.00	259
male	0	2	1	30	0	5.99	72.7	1.020	2.270			2.260	7.220	9.540	25.91		69.7	48.5	0.69	4.56	139.9	19.56	7.3	5.05	159	1.67	2.78	0.25	233
male	0	2	1	39	0	3.50	77.0	1.020	4.370	13.440		4.580	1.480	13.200	36.49		73.3	50.4	0.95	4.05	145.0	18.35	6.0	5.56	175	2.22	14.46	0.79	210
male	0	2	1	48	0	5.30	92.0	1.020	3.100	7.180		4.550	0.682	10.630	33.34		73.7	49.5	1.08	4.41	141.7	15.21	3.4	4.98	160	2.78	21.68	0.79	186
male	0	2	1	48	0	8.80	86.0	1.030	1.960	8.230		7.160	1.100		58.85		72.8	51.2	1.08	3.90	142.0	18.50	6.7	5.43	172	7.23	7.78	0.25	219
male	0	2	1	48	0	4.23	81.1	1.010	1.540						38.16		72.5	46.2	0.76	4.17	138.2	11.37	6.4	5.23	149	0.56	1.67	0.12	285
male	0	2	1	26	0	4.00	86.4	1.010	2.420			24.010		13.400	50.77		72.6	50.0	0.38	4.09	143.2	20.29	6.3	5.25	163	0.56	2.22	0.00	222
male	0	2	1	28	0	6.56	96.0	1.025	1.130			12.520		12.630	45.69		71.8	43.5	0.89	3.87	137.6	18.67	7.0	5.33	148	0.56	7.23	0.00	292
male	0	2	1	32	0	4.49	80.3	1.025	1.150			4.590	1.840	14.500	29.59		77.6	52.0	0.71	4.07	136.0	15.97	5.3	5.78	129	3.89	2.22	0.00	313
male	0	2	1	32	0	4.04	78.4	1.015	0.690			3.540	1.890	10.680	45.08		74.4	46.5	0.68	3.97	141.8	12.37	4.7	5.08	146	2.78	4.45	1.02	235
male	0	2	1	47	0	4.70	84.0	1.015	2.400	13.090		6.700	10.450	15.570	28.77		70.5	48.8	1.11	4.24	142.0	14.04	6.5	5.45	162	3.89	1.11	0.12	232
male	0	2	1	30	0	4.70	84.0	1.015	0.553	7.940		10.920	2.230	12.710	60.22		76.8	52.0	0.59	4.41	144.0	20.01	5.7	5.49	155	0.56	0.56	0.00	201
male	0	2	1	27	0	4.50	85.0	1.020	2.550			6.430		11.690	32.41		77.2	53.2	0.88	3.97	142.0	19.97	6.2	5.29	159	4.45	2.78	0.00	201
male	0	2	1	27	0	6.30	96.0	1.015	1.710			5.500		7.610	30.57		75.5	54.0	0.84	4.22	139.0	14.22	4.8	6.42	137	1.11	1.67	0.12	218
male	0	2	1	50	0	5.63	82.9	1.015	2.010	10.210		0.764	1.360	10.400	40.57		68.3	46.7	0.84	4.32	142.0	17.72	6.6	4.92	151	1.22	0.55	0.12	205
male	0	2	1	33	0	4.10	83.0	1.020	1.980	9.110		7.890	2.770	8.130	34.92		75.9	52.6	0.79	4.30	139.0	17.50	9.9	5.45	164	1.11	4.45	0.64	288
male	0	2	1	32	0	5.70	86.0	1.015	0.924			3.950	7.460	11.350	42.34		81.7	54.4	0.81	4.48	141.0	11.48	6.5	5.30	152	10.56	3.34	1.15	264
male	0	2	1	47	0	6.90	75.0	1.020	2.390	9.740		1.190	3.400	8.460	37.75		68.5	45.3	1.32	4.22	140.0	16.72	5.2	4.83	149	0.56	6.12	0.12	227
male	0	2	1	30	0	4.70	83.0	1.025	1.810	16.430		4.830		10.740	60.18		75.1	48.7	1.13	4.31	137.0	14.61	7.4	5.24	157	3.34	5.00	0.25	284
male	0	2	1	42	0	4.53	86.0	1.020	0.999	3.690		9.550	1.280	10.390	41.83		69.1	48.5		4.55	138	15.61	7.5	4.53	146	2.22	12.23	1.79	265
male	0	2	1	30	0	4.54	75.1	1.010	0.536			3.270	31.650	11.390	37.14		80.1	49.5	0.33	4.53	137.3	15.93	7.2	4.90	152	0.56	1.67	0.00	267
male	0	2	1	48	0	4.24	77.9	1.005	3.540	5.640		19.790	3.080	15.470	41.23		73.2	44.7	1.00	4.16	141.3	13.06	7.2	4.90	145	2.78	2.22	0.00	257
male	0	2	1	46	0	5.40	80.0	1.025	1.080	16.630		4.470	1.970	11.200	60.08		72.0	47.1	0.71	3.86	144.0	14.76	6.1	4.57	148	11.68	3.34	0.25	218
male	0	2	1	45	0	5.40	76.0	1.015	0.898	14.200		6.340	4.680	11.240	42.17		71.8	47.0	1.13	4.53	142.0	17.73	7.2	5.20	152	1.81	0.15	0.4	285
male	0	2	1	37	0	4.85	81.0	1.010	2.740	8.500		24.280	1.580	7.410	43.49		70.5	42.7	0.94	4.06	143.8	15.36	6.9	5.15	135	1.45	0.41	0.2	212
male	0	2	1	49	0	6.10	89.0	1.025	1.010	3.670		4.400	1.130	11.570	50.44		72.5	50.1	0.87	4.09	142.0	16.99	7.2	4.78	145	0.56	3.34	0.25	222
male	0	2	1	49	0	6.60	81.0	1.15	1.790	14.800				13.270	36.28		78.8	49.1	0.47	4.49	142.2	19.49	7.3	5.13	157	0.70	1.22	0.40	312
male	0	2	1	32	0	4.17	81.8	1.025	1.400			1.170	11.680	11.500	49.10		73.7	48.8	1.31	4.53	141.1	19.93	8.0	5.26	157	2.22	3.89	0.38	297
male	0	2	1	28	0	5.24	80.2	1.010	2.360			5.280		11.220	58.82		76.4	45.9	0.58	4.15	138.4	13.65	3.9	5.09	157	4.45	2.78	0.00	257
male	0	2	1	50	0	4.00	84.0	1.020	0.944	8.020	7.950	6.160	8.210	8.210	31.94		70.0	44.5	0.78	4.25	141.0	15.95	6.0	4.60	146	4.45	7.23	0.51	211
male	0	2	1	46	0	5.06	80.2	1.020	3.390	9.560		14.150	1.150	10.910	48.17		79.1	51.1	0.80	4.44	138.3	16.04	6.9	5.57	164	8.90	12.23	0.38	234
male	0	2	1	38	0	4.14	59.6	1.015	1.950	7.280		7.080	3.590	12.980	49.32		73.1	48.6	0.56	4.09	141.6	15.69	6.9	5.24	125	2.22	1.75	0.89	265
male	0	2	1	41	0	4.82	77.0	1.010	4.230	19.310		5.650	5.360	15.880	58.36		77.2	44.8	0.94	4.29	141.0	16.19	4.8	4.69	110	2.05	1.55	0.75	275
male	0	2	1	35	0	5.00	91.0	1.020	3.170	8.980		17.420	1.660	14.190	24.28		72.4	47.8	0.63	4.16	144.0	12.36	6.2	5.38	169	0.56	3.34	0.12	247
male	0	2	1	24	0	6.80	73.0	1.030	4.070	13.000		15.570	1.060	10.610	58.40		78.7	51.8	0.63	5.30	141.0	15.50	7.6	4.99	150	5.00	5.00	0.51	299
male	0	2	1	46	0	5.40	77.0	1.025	1.920	7.350		4.820	0.843	15.910	52.94		73.1	48.7	1.04	4.87	143.0	18.97	4.9	4.40	143	3.34	4.45	1.53	279
male	0	2	1	46	0	6.20	76.0	1.030	2.110	10.980		9.010	2.930	10.450	38.42		73.9	47.5	1.12	4.61	141.0	17.41	6.5	6.46	145	11.12	18.90	0.76	222
male	0	2	1	23	0	6.09	67.3	1.020	1.890			6.960		9.910	50.32		73.5	49.2	0.65	4.04	138.9	19.74	5.3	5.00	151	0.56	1.67	0.00	224
male	0	2	1	34	0	4.51	81.6	1.010	3.650			11.550	0.981	8.970	38.65		68.5	45.7	0.77	4.20	135.4	12.60	4.4	5.87	146	0.00	2.22	0.00	284
male	0	2	1	39	0	6.68	85.7	1.025	0.869			6.650	3.960	35.610	22.54		72.3	47.0	1.10	4.78	140.9	19.68	5.8	5.30	158	0.56	3.34	0.76	227
male	0	2	1	38	0	4.70	76.0	1.020	2.860			21.300	2.900	10.840	32.31		77.8	52.6	0.88	4.15	140.6	17.85	4.6	5.15	153	5.00	5.00	0.64	282
male	0	2	1	34	0	3.88	80.0	1.015	0.600			2.340	3.940	11.220	27.52		76.7	50.1	1.15	4.47	141.4	18.87	5.4	5.60	169	1.11	2.78	0.00	252
male	0	2	1	36	0	4.30	80.0	1.025	1.740	7.080	5.050	7.270	15.750	12.590	49.36		72.9	52.4	0.98	3.99	141.8	15.69	9.4	5.51	162	31.69	26.13	0.25	267
male	0	2	1	50	0	6.05	73.6	1.020	3.760	7.380		6.160	3.590	7.420	26.51		67.1	47.0	1.06	4.08	140.0	16.68	7.2	5.23	163	9.45	20.02	1.53	259
male	0	2	1	35	0	4.50	75.0	1.025	1.090	5.790		6.230	0.584	16.230	24.68		75.3	51.8	0.74	4.55	136.5	16.85	5.1	5.35	155	1.11	2.78	0.00	232
male	0	2	1	27	0	3.29	77.2	1.020	1.500			6.100		12.990	44.46		77.6	45.9	0.55	3.92	138.7	15.92	7.3	5.25	153	5.56	5.56	0.38	349
male	0	2	1	24	0	6.14	83.1	1.005	1.720			4.570		13.920	41.54		71.9	44.1	0.48	3.39	136.2	13.59	6.9	5.32	155	0.56	2.78	0.00	210
male	0	2	1	27	0	4.27	77.7	1.010	2.160			9.430		12.860	40.15		78.9	46.6	0.50	4.20	138.8	18.20	7.8	5.19	158	0.56	3.89	0.12	240
male	0	2	1	45	0	5.38	85.4	1.015	1.540	4.080		14.810	1.420	12.730	49.78		74.7	46.0	1.19	3.76	139.1	17.36	5.6	5.41	163	4.45	3.34	0.25	204
male	0	2	1	43	0	4.60	92.0	1.015	1.660	9.410		11.940	2.020	11.950	29.52		79.9	45.6	0.56	3.98	141.9	13.18	6.2	6.26	175	1.67	3.34	0.12	128
male	0	2	1	45	0	4.22	74.0	1.010	2.330	17.310		14.770			34.12		69.6	46.5	0.99	4.56	140.8	15.56	5.5	4.87	154	0.85	2.00	0.15	238
male	0	2	1	42	0	6.85	83.3	1.015	3.230	10.320		11.740	1.150	15.740	50.42		77.4	51.6	1.21	4.16	142.3	18.26	7.6	4.97	153	0.15	0.77	0.00	223
male	0	2	1	45	0	4.51	63.4	1.015	1.280			23.830	2.140	8.670	43.54		75.1	47.0	0.75	4.09	139.4	16.89	5.8	4.48	136	2.98	1.88	0.80	309
male	0	2	1	33	0	3.60	77.0	1.025	2.060			25.580	4.650	9.510	42.78		73.0	45.5	0.89	3.76	140.0	18.36	6.8	5.39	156	1.11	22.24	1.72	270
male	0	2	1	43	0	4.30	76.6	1.015						9.510	27.28		72.0	46.6	0.81	4.15	138.6	13.65	3.9	4.97	150	16.68	1.67	0.25	194
male	0	2	1	26	0	4.30	74.0	1.025	1.160			7.450		11.490	42.51		78.6	49.4	0.76	3.74	138.8	16.34	6.7	5.65	166	3.89	9.45	0.51	267
male	0	2	1	32	0	4.99	88.3	1.020	1.730			0.600	1.430	15.240	41.58		83.3	50.2	0.93	3.79	138.6	20.09	4.2	5.13	158	0.56	2.22	0.12	245
male	0	2	1	34	0	5.29	78.1	1.010	1.380			3.520	2.940	14.450	35.27		74.3	47.1	0.48	4.29	138.3	16.49	9.6	5.42	154	8.34	1.11	0.12	232
male	0	2	1	42	0	4.60	69.0	1.015	1.740	5.780		9.120	0.748	15.760	53.44		72.0	48.4	1.05	4.34	142.8	18.14	6.4	5.31	152	0.56	1.67	0.00	347
male	0	2	1	40	0	5.50	65.0	1.015	4.270	9.050		17.010	8.340	14.130	57.11		72.0	49.1	0.38	3.72	143.0	15.82	7.5	5.35	146	1.78	1.22	0.15	212
male	0	2	1	32	0	5.20	76.0	1.015	1.890	7.990		6.410	2.290	12.860	34.59		72.7	47.5	0.53	4.06	140.9	12.56	4.5	5.68	167	10.56	3.34	0.12	253
male	0	2	1	46	0	4.60	86.0	1.010	0.278	7.420		6.600	2.920	11.280	57.15		67.6	43.8	1.01	4.08	141.0	13.98	7.6	5.26	150	22.24	55.60	1.28	224
male	0	2	1	40	0	4.85	75.2	1.025	2.370			10.150	3.330	9.350	47.05		71.3	47.5	0.64	3.90	138.5	17.50	6.8	5.37	156	2.78	3.89	0.00	246
male	0	2	1	46	0	5.00	83.0	1.025	2.970	11.000		4.840	6.040	9.960	32.07		71.7	48.3	0.14	4.43	144.0	18.93	10.1	4.78	144	5.00	3.34	0.00	325
male	0	2	1	32	0	6.00	79.0		1.930	7.140		4.710	1.200	15.800	47.49		69.9	50.7	1.01	4.77	143.0	20.17	6.3	4.92	149				280
male	0	2	1	28	0	3.85	76.1	1.020	1.790			4.980		11.290	42.25		74.9	48.1	0.87	4.01	139.0	18.11	5.2	4.94	150	1.67	1.11	0.00	298
male	0	2	1	25	0	6.10	83.0	1.020	2.120			7.990		12.960	50.94		79.8	52.4	0.70	4.58	143.0	15.48	6.0	4.97	148	1.67	4.45	0.12	228
male	0	2	1	44	0	4.70	84.0	1.025	1.530	9.140		5.980	1.320	12.310	42.00		74.9	50.1	0.69	4.25	141.0	17.45	6.0	4.76	144	2.22	1.67	0.38	156
male	0	2	1	43	0	4.00	82.0	1.025	1.340	8.270		9.590	1.030	9.520	35.61		74.8	49.3	0.76	4.08	140.8	16.08	6.7	5.16	152	2.78	135.11	0.92	321
male	0	2	1	46	0	6.60	60.0	1.030	1.590	2.620		6.280	1.120	10.410	40.06		70.2	48.9	0.62	4.47	143.0	19.97	5.4	4.33	139	7.23	13.90	0.64	315
male	0	2	1	27	0	5.10	90.0	1.015	2.080			4.500		11.180	42.78		74.5	49.7	0.65	4.53	144.9	16.13	5.5	5.27	154	7.23	2.78	0.12	302
male	0	2	1	33	0	5.26	90.5	1.020	2.300			2.760	9.380	20.150	54.84		72.8	47.7	0.84	3.72	137.5	18.72	4.9	5.48	157	0.56	1.67	0.00	288
male	0	2	1	46	0	5.08	85.7	1.025	0.813	7.400		6.560	3.270	14.760	30.72		74.7	45.8	0.91	3.56	141.3	13.36	6.5	5.06	154	3.34	33.92	0.34	266
male	0	2	1	44	0	5.10	74.0	1.015	1.970	7.350		13.750	36.180	10.540	33.01		76.4	45.7	1.01	3.76	144.5	16.56	9.1	5.84	174	7.78	20.57	0.76	192
male	0	2	1	31	0	4.90	83.0	1.015	2.930	7.650		23.120	1.480	12.660	62.14		76.2	50.2	0.42	4.27	143.0	11.47	7.4	6.10	171	12.23	3.34	0.00	279
male	0	2	1	40	0	5.80	79.0	1.005	1.940	12.540		4.970	0.890	18.980	43.24		83.8	54.2	0.83	4.58	140.0	18.88	7.5	4.81	157	0.56	0.56	0.00	259
male	0	2	1	40	0	4.40	82.0	1.005	2.240			14.160	0.793	11.640	29.83		76.1	49.5	0.72	4.16	142.5	16.26	6.4	5.07	151	2.22	4.45	0.12	252
male	0	2	1	48	0	3.60	74.0	1.015	1.710	12.740		11.510	0.757	13.380	33.32		77.8	46.9	1.07	4.05	138.0	15.35	7.5	4.80	130	0.56	3.34	0.00	301
male	0	2	1	49	0	4.55	58.0	1.015	1.110	3.450		6.870		11.560	39.30		70.9	45.3	0.72	4.04	145.3	16.64	5.2	5.15	172	1.33	0.15	0.12	267
male	0	2	1	27	0	3.40	85.0	1.015	9.560			21.340		9.730	33.45		78.0	46.2	0.73	4.15	140.6	15.55	6.6	5.00	155	10.03	7.23	0.51	271
male	0	2	1	49	0	5.02	86.0	>=1.030	1.800	8.320		11.750	1.020	12.180	65.18		73.3	52.9	0.79	4.62	139.2	15.82	6.1	5.29	157	5.56	0.00	0.00	212
male	0	2	1	24	0	4.12	92.3	1.015	1.160			4.960		10.580	32.60		73.3	46.5	0.80	4.10	138.9	12.70	6.6	4.75	149	7.55	0.85	0.12	325
male	0	2	1	24	0	5.04	91.7	1.025	2.310			7.360		12.540	34.69		74.8	46.1	0.45	3.96	140.8	20.26	6.2	5.46	155	7.23	0.56	0.00	222
male	0	2	1	34	0	5.04	74.1	1.025	2.300			5.980	2.630	11.780	32.92		72.9	46.5	1.01	4.09	141.5	9.99	5.6	5.34	151	7.78	3.34	0.12	239
male	0	2	1	48	0	4.66	73.0	1.015	2.630	9.070		14.800	1.290	12.410	25.99		67.9	40.8	1.17	3.98	137.5	7.78	6.5	4.15	135	7.5	6.5	0.86
male	0	2	1	45	0	3.50	77.0	1.005	0.256	4.470		7.220	0.670	13.380	34.71		68.5	47.4	0.87	3.90	142.2	13.20	5.0	5.41	158	10.56	1.67	0.00	367
male	0	2	1	35	0	7.10	85.0	1.015	2.180	5.980		6.740	7.990	15.000	60.71		70.2	50.5	0.70	4.50	143.0	16.70	7.0	5.15	150	1.22	1.65	0.60	208
male	0	2	1	21	0	4.50	70.0	1.015	3.710	5.980		6.090	3.990	19.230	12.81		78.4	51.6	0.57	4.33	142.0	19.13	6.4	5.33	157	3.55	1.22	0.50	227
male	0	2	1	43	0	4.49	72.0	1.010	1.350			6.870	25.220	10.260	27.90		73.4	48.1	0.83	4.11	139.3	17.51	7.6	5.14	154	0.11	1.66	0.12	210
male	0	2	1	42	0	5.10	78.0	1.010	4.030	7.310		0.600	1.310	12.870	61.33		71.5	49.0	0.97	4.50	143.0	17.30	5.5	4.89	145	1.11	4.45	0.00	296
male	0	2	1	50	0	5.30	96.0	1.025	1.430	8.760		8.790	1.050	11.280	37.66		68.0	47.2	0.93	4.02	141.0	18.62	5.8	5.12	151	7.78	14.46	0.69	296
male	0	2	1	28	0	4.41	82.6	1.020	2.580			5.350		10.420	53.67		74.3	52.2	0.64	3.85	139.2	13.65	4.7	4.92	149	0.56	1.11	0.00	205
male	0	2	1	31	0	3.21	86.1	1.015	3.060			1.010	3.820	10.580	28.30		72.6	48.2	0.44	3.98	140.7	15.58	4.4	5.25	156	1.67	1.67	0.00	188
male	0	2	1	27	0	4.14	62.3	1.010	1.180			5.910		11.180	31.49		74.4	48.8	1.03	3.74	138.7	16.94	6.5	5.32	157	0.56	5.00	0.00	254
male	0	2	1	35	0	4.80	89.0	1.020	1.290			6.500	0.876	13.220	25.06		73.8	49.4	0.56	4.38	141.4	16.28	5.1	4.82	150	4.45	2.78	0.00	265
male	0	2	1	29	0	5.60	67.0	1.015	1.390			14.640		9.960	39.26		65.1	45.4	0.70	3.95	139.0	17.65	6.7	4.78	143	0.56	1.67	0.00	180
male	0	2	1	33	0	4.10	81.0	1.010	1.480			8.790	6.320	15.120	33.03		72.6	50.2	0.80	4.07	139.2	7.77	6.2	4.87	147	1.11	2.78	0.00	266
male	0	2	1	28	0	4.50	72.0	1.025	2.630	19.150		0.600	1.640	12.370	28.56		75.6	51.5	0.82	4.15	142.0	18.25	7.6	5.43	154	15.01	6.67	0.64	295
male	0	2	1	29	0	4.00	72.0	1.015	0.764	7.960		3.750	1.550	10.520	26.63		74.8	46.6	0.85	3.95	139.8	14.05	6.8	5.06	150	11.68	2.22	0.00	283
male	0	2	1	43	0	6.90	64.0	1.030	1.890	11.470		11.920	0.908	13.470	34.48		78.8	52.2	0.55	4.16	142.0	12.56	4.7	4.61	150	7.78	6.67	0.69	182
male	0	2	1	45	0	5.30	62.0	1.020	1.600	3.990		5.590	1.540	11.400	35.59		77.0	52.1	0.83	4.22	138.0	19.42	7.3	4.74	150	5.00	0.56	0.00	203
male	0	2	1	36	0	4.90	73.0	1.030	2.100	10.480	4.630	9.630	1.470	11.400	24.36		66.1	47.4	0.73	4.17	140.7	16.27	8.1	5.12	138	1.67	7.23	0.51	290
male	0	2	1	31	0	4.50	89.0	1.020	1.760	2.980		9.630	2.940	9.880	42.39		70.5	48.9	1.01	3.91	142.0	18.11	6.5	5.28	158	1.67	6.67	0.25	222
male	0	2	1	50	0	4.68	81.1	1.025	1.160						36.29		65.8	45.9	0.91	4.30	138.5	17.10	5.1	4.61	157	1.11	4.45	0.38	251
male	0	2	1	27	0	5.38	88.0	1.020	2.570			5.090		14.790	55.26		81.4	47.1	0.54	3.61	140.8	16.21	4.8	5.07	160	7.78	3.34	0.00	251
male	0	2	1	49	0	4.40	76.5	1.015	3.250	8.100		0.600	0.809	13.050	64.21		80.9	47.6	0.95	4.33	139.2	16.53	6.8	5.31	155	6.67	5.02	0.51	246
male	0	2	1	31	0	3.10	70.0	1.015						12.730	32.97		76.3	43.9	0.46	4.08	140.1	13.38	7.5	5.24	150	4.12	2.12	0.00	212
male	0	2	1	38	0	6.70	61.0	1.005	4.600	12.360		55.710	2.420	13.310	54.52		79.7	51.1	0.66	4.64	143.8	17.64	6.5	5.12	145	1.11	1.11	0.00	255
male	0	2	1	47	0	5.10	83.0	1.015	1.040	9.430		12.010	4.120	12.400	32.67		81.6	51.3	0.97	4.74	138.9	16.54	3.9	5.31	160	1.45	0.12	0.56	156
male	0	2	1	49	0	5.90	96.0	1.020	1.520	17.890		4.940	4.990	15.920	44.94		78.4	47.2	1.05	4.60	142.0	17.70	5.6	5.53	172	6.12	14.46	1.15	351
male	0	2	1	43	0	5.18	91.0	1.020	2.090	7.710		9.070	1.130	9.790	34.32		72.2	46.6	1.09	4.58	140.1	16.98	6.8	4.93	152	0.78	0.50	1.05	277
male	0	2	1	28	0	5.70	85.0	1.015	1.970	4.810		2.520	2.010	12.330	42.87		73.0	52.2	0.42	4.34	142.0	19.84	6.3	4.85	154	1.18	0.70	0.06	189
male	0	2	1	41	0	6.87	79.0	1.020	3.440			15.880	0.904		68.43		72.3	49.2	0.65	4.33	140.1	16.63	6.1	5.11	162	0.00	0.00	0.00	213
male	0	2	1	35	0	4.65	64.0	1.030	0.959			3.870	0.976	12.980	30.19		69.7	44.6	0.83	4.50	139.4	16.60	5.2	5.38	168	6.67	8.34	0.69	286
male	0	2	1	28	0	4.37	92.6	1.005	2.050			4.950		9.620	43.88		70.3	49.7	0.74	4.61	138.9	17.61	4.1	5.22	156	3.89	2.22	0.12	282
male	0	2	1	27	0	4.65	66.8	1.020	1.530			4.800		10.240	56.22		74.6	52.3	1.01	4.50	140.5	18.80	5.9	5.33	158	5.00	8.90	0.38	258
male	0	2	1	27	0	3.63	76.6	1.015	4.540			14.200		11.670	47.57		74.6	46.4	1.34	4.40	140.3	16.80	6.1	4.73	148	0.56	1.67	0.00	238
male	0	2	1	36	0	7.00	88.0	1.020	3.020			11.890	1.390	12.040	30.94		74.2	52.9	0.72	3.86	140.7	12.66	7.2	5.02	150	0.56	1.67	0.51	213
male	0	2	1	45	0	5.10	74.0	1.005	1.750	11.660		3.060	1.200	11.880	31.91		69.4	48.4	0.76	3.89	139.8	15.09	5.6	4.93	150	7.78	5.56	0.25	242
male	0	2	1	32	0	4.78	91.0	1.015	1.100			9.100	15.030	10.340	41.05		77.4	47.7	0.74	4.00	140.5	18.60	7.2	5.01	145	2.78	2.78	0.00	272
male	0	2	1	50	0	4.20	58.0	1.010	2.180	7.790		7.830	3.070	10.680	31.43		74.1	51.4	0.42	4.51	142.0	16.41	5.4	4.91	156	6.67	11.12	0.51	287
male	0	2	1	33	0	3.95	72.8	1.020	2.040			12.290	1.170	12.660	35.22		71.4	48.5	0.79	4.06	139.5	18.16	5.1	5.42	156	2.22	1.67	0.00	250
male	0	2	1	37	0	5.40	83.0	1.010	2.660	10.620		9.690	4.950	15.730	63.05		78.4	49.1	1.02	4.07	141.0	13.07	7.5	5.12	135	0.11	1.00	0.12	264
male	0	2	1	23	0	5.00	84.0	1.020	3.530			0.600		13.120	59.06		77.0	53.9	0.56	4.48	140.0	18.18	6.2	5.13	158	17.79	13.34	0.00	311
male	0	2	1	24	0	4.60	89.4	1.015	3.120			2.420		7.740	19.36		76.1	49.5	0.49	4.36	138.7	14.46	5.0	5.18	164	1.11	3.34	0.00	211
male	0	2	1	34	0	6.80	83.0	1.025	2.980			1.260	3.030	12.190	33.31		70.2	50.9	0.76	4.60	141.6	12.90	8.7	5.28	161	0.56	3.34	0.38	239
male	0	2	1	36	0	3.49	69.2	1.005	1.010			9.140	2.240	10.480	38.00		73.1	45.7	0.71	4.05	139.8	17.55	8.5	5.10	159	3.89	2.22	0.00	300
male	0	2	1	46	0	5.90	84.0	1.025	1.030	12.720		5.910	1.620	13.680	57.02		69.1	46.9	0.75	4.06	142.0	17.96	5.6	5.38	146	2.22	3.34	0.00	229
male	0	2	1	46	0	5.40	74.5	1.025	1.730	4.750		6.770	1.140	12.710	35.56		72.3	47.3	1.13	3.80	139.5	18.00	6.1	5.38	163	5.56	2.78	0.51	209
female	0	2	2	34	0	3.50	54.3	1.005	1.010	9.660	15.400	5.350	2.390		30.52		78.2	46.3	0.49	3.89	137.0	16.29	5.9	4.63	143	11.68	2.78	0.64	263
female	0	2	2	27	0	5.06	69.7	1.025	0.569	15.650	11.490	3.000	1.960	10.350	66.29		77.4	43.6	0.54	4.11	138.6	18.01	5.2	4.29	124	16.68	22.24	0.69	308
female	0	2	2	29	0	5.40	61.0	1.030	0.755	16.690	12.950	7.150	4.590	10.620	53.10	47.94	72.5	48.8	0.58	4.61	145.3	16.11	6.6	4.76	145	2.78	9.45	0.76	248
female	0	2	2	37	0	6.10	51.0	1.010	1.330	13.340	6.130	5.040	1.930	8.130	44.63	37.49	78.8	51.1	0.50	4.16	141.1	13.56	6.8	4.69	134	6.67	1.67	0.00	305
female	0	2	2	47	0	5.51	71.0	1.010	2.090	11.530	9.930	47.240	0.812	13.680	43.85	56.54	73.7	49.8	0.45	3.97	140.2	15.87	7.5	4.45	125	1.02	0.68	0.15	258
female	0	2	2	50	0	5.11	59.1	1.015	0.880	13.170	5.020	6.110	6.790	8.550	39.18	48.82	68.2	41.8	0.62	4.08	139.3	14.28	6.3	4.15	133	1.0	0.12	0.55	198
female	0	2	2	33	0	4.40	61.0	1.020	0.698	15.030	7.270	5.930	2.010	10.100	38.85	32.13	75.7	51.3	0.48	4.05	138.8	16.65	4.8	4.43	128	11.68	6.67	0.69	229
female	0	2	2	49	0	3.90	41.0	1.025	0.971	8.820	6.860	4.300	1.380	12.710	33.47	38.18	74.4	45.6	0.66	3.65	141.6	6.45	5.6	4.36	137	16.68	10.56	0.51	222
female	0	2	2	48	0	5.40	47.0	1.015	1.250	11.060	13.320	0.621	3.670	12.590	29.73	27.36	77.6	47.3	0.59	4.25	140.9	16.95	6.7	4.80	131	0.86	0.15	0.30	342
female	0	2	2	42	0	3.90	49.0	1.010	0.866	10.210	9.900	5.970	2.960	10.450	33.57	20.97	79.3	51.3	0.66	4.53	140.9	18.03	6.5	4.73	145	6.12	6.12	0.38	289
female	0	2	2	30	0	3.60	55.0	1.025	2.070	13.340	5.060	35.340	0.894	11.870	45.57	38.85	72.9	47.4	0.36	4.09	139.0	18.79	5.2	4.38	139	2.58	0.18	0.15	241
female	0	2	2	38	0	4.70	69.0	1.020	1.730	14.180		7.950	27.350	13.230	36.91		69.7	45.7	0.39	4.31	140.0	15.51	4.6	4.09	126	8.90	5.00	0.12	220
female	0	2	2	49	0	4.80	60.0	1.015	0.839	9.620	7.740	8.420	2.520	7.470	56.59	41.37	70.4	45.3	0.89	4.54	142.0	16.14	7.5	5.15	145	0.15	2.18	0.00	300
female	0	2	2	48	0	5.30	56.3	1.015	1.120	4.310	5.260	4.860	0.936	8.880	68.61	31.32	76.3	45.1	0.71	4.39	138.2	11.39	6.5	5.15	125	2.16	2.22	0.12	235
female	0	2	2	42	0	3.66	51.5	1.020	0.860	7.460	4.220	3.200	1.090	9.940	29.83	32.64	73.1	46.1	0.97	4.67	140.4	16.27	5.4	4.67	130	1.87	1.11	0.00	255
female	0	2	2	38	0	4.52	60.1	1.015	0.690	18.960	14.340	7.980	7.590	8.990	26.88		75.6	43.6	0.59	4.70	141.0	13.90	4.3	4.90	135	7.5	2.11	0.65	199
female	0	2	2	34	0	4.70	58.0	1.025	0.933	20.920	10.750	10.370	0.896	20.660	35.74	41.89	69.6	44.3	0.60	3.91	143.0	14.31	5.9	4.29	129	13.34	27.80	0.69	223
female	0	2	2	41	0	4.29	56.0	1.015	0.673	12.810	15.440	11.640	0.792	11.060	52.82	37.92	72.4	41.8	0.54	3.81	138.0	9.21	6.0	4.67	123	9.15	12.79	0.76	314
female	0	2	2	40	0	5.20	59.0	1.020	1.270	26.850	20.010	7.720	3.000	10.310	43.97	41.41	73.9	51.4	0.40	4.08	142.9	18.68	5.95	5.11	122	3.89	3.89	0.25
female	0	2	2	50	0	4.40	63.0	1.010	3.210	10.720	18.180	7.620	10.330	15.520	38.20	36.33	77.1	48.4	0.70	4.21	142.0	15.31	5.4	4.75	124	5.00	18.35	0.25	250
female	0	2	2	46	0	6.50	65.0	1.025	0.953	13.710	10.530	4.420	1.700	12.430	36.45	31.37	72.3	48.5	0.45	4.44	142.0	17.84	6.5	4.57	140	14.46	13.34	1.79	248
female	0	2	2	40	0	4.90	61.0	1.030	1.550	16.470	8.350	9.650	8.840	15.900	36.55	38.27	70.7	48.5	0.64	4.54	142.0	20.34	5.7	4.82	139	16.68	4.45	0.25	289
female	0	2	2	33	0	4.40	48.0	1.030	4.160	10.940	6.460	12.900	1.690		32.49		78.8	49.5	0.87	3.94	139.0	17.34	8.5	4.97	143	7.02	13.34	0.25	294
female	0	2	2	44	0	4.80	70.0	1.015	2.730	6.770	5.770	1.040	10.480	8.190	34.08	36.79	67.5	42.8	0.50	4.07	139.7	19.47	7.2	4.86	140	12.23	3.89	0.76	235
female	0	2	2	43	0	3.83	59.3	1.020	2.420	12.330	9.110	13.730	9.270	10.640	40.75	38.65	72.4	45.8	0.93	3.98	138.0	20.38	6.4	4.41	137	0.56	1.67	1.02	279
female	0	2	2	33	0	5.40	47.0	1.020	1.970	18.930	19.420	0.600	0.861		35.46		73.1	47.1	0.66	3.77	142.0	16.77	4.7	4.17	124	11.68	6.67	0.51	264
female	0	2	2	45	0	6.90	51.0	1.015	1.190	6.330	3.080	11.360	0.490	16.080	34.45	41.92	76.0	42.9	0.62	4.71	140.5	13.01	5.7	4.67	131	4.45	12.79	0.00	301
female	0	2	2	50	0	2.90	56.0	1.015	0.816	10.040	3.300	13.700	2.720	12.520	37.22		73.5	41.5	0.73	4.06	141.0	16.76	5.9	5.12	147	2.85	2.15	1.11	255
female	0	2	2	47	0	4.50	57.0	1.020	0.691	11.200	4.000	6.380	9.360	9.870	41.36	37.62	75.7	49.7	0.69	3.94	138.7	12.54	7.3	4.97	129	21.13	89.52	1.92	341
female	0	2	2	32	0	4.90	44.0	1.015	0.831	12.210	5.560	17.200	3.610	14.120	40.07	42.73	74.7	46.2	0.75	3.75	136.1	16.35	6.8	4.76	143	0.56	1.67	0.00	290
female	0	2	2	39	0	5.70	73.0	1.025	1.800	16.020	14.100	0.600	1.470	11.190	56.49	23.66	76.8	46.8	0.43	4.58	140.0	17.88	6.6	4.68	138	20.02	2.22	0.34	318
female	0	2	2	38	0	4.70	56.0	1.020	0.908	12.040	4.190	13.440	1.980	10.340	33.23	30.49	71.9	49.6	0.50	4.20	138.3	16.70	6.4	4.25	125	11.12	10.56	1.28	278
female	0	2	2	45	0	5.50	54.0	1.020	1.470	6.120	3.090	17.970	0.700	16.220	42.60	27.56	72.1	49.5	0.69	4.56	146.5	18.56	5.55	5.12	127	7.23	10.01	0.25
female	0	2	2	44	0	5.83	72.0	1.025	3.550	10.260	18.700	<0.600	1.140	11.900	50.55	42.27	78.0	46.1	0.47	4.23	140.5	14.83	5.9	4.65	136	1.67	2.78	0.51	236
female	0	2	2	46	0	3.30	55.0	1.020	1.590	23.590	13.810	8.680	2.000	14.210	42.05	47.54	66.2	43.9	0.62	4.62	140.0	15.32	4.4	4.59	131	7.23	3.34	1.28	179
female	0	2	2	45	0	6.80	59.0	1.014	1.150	15.370	14.830	8.700	1.040		49.25		73.5	46.6	0.62	4.53	138.0	14.63	5.5	4.65	133	0.67	0.85	0.00	215
female	0	2	2	40	0	3.40	71.0	1.025	1.780	30.640	10.660	12.220	0.987	11.120	63.03	48.05	70.1	46.0	0.78	3.70	138.0	11.70	5.3	4.44	138	10.56	15.01	1.40	226
female	0	2	2	38	0	4.62	53.9	1.010	1.020	8.650	10.950	5.680	1.490	8.730	53.74	36.83	72.6	46.9	0.40	4.05	140.4	19.95	5.2	4.67	139	6.67	2.22	0.51	193
female	0	2	2	29	0	4.60	61.0	1.015	0.643	6.580	3.270	19.860	0.776	11.650	30.88	44.79	70.9	45.6	0.62	4.57	138.2	11.47	4.8	4.23	129	13.34	9.45	0.89	238
female	0	2	2	48	0	4.09	46.7	1.015		11.250	6.790	10.910	2.230	8.650	30.99	45.62	74.2	45.1	0.61	4.02	140.7	13.62	4.8	4.27	128	1.22	0.55	0.12	273
female	0	2	2	50	0	4.82	67.0	1.005	0.724	23.540	11.730	6.450			36.16		74.9	43.5	0.66	4.53	139.2	14.83	5.2	4.56	134	2.22	16.12	0.12	263
female	0	2	2	42	0	5.80	52.0	1.005	0.851	7.470	3.940	5.410	3.010	15.720	44.35		75.5	53.0	0.61	4.03	140.8	20.33	5.4	4.82	139	5.56	22.24	0.00	206
female	0	2	2	45	0	6.40	53.0	1.015	0.814	13.340	4.100	8.340	2.960	8.620	50.83		77.1	45.2	1.00	4.10	142.0	16.40	5.75	4.12	125	1.22	0.25	0.15	215
female	0	2	2	33	0	3.80	61.7	1.015	1.390	11.410	11.820	7.180	1.420		40.16		75.5	42.2	0.38	3.86	138.0	15.66	6.9	4.81	143	16.68	6.12	1.79	272
female	0	2	2	34	0	4.02	49.8	1.025	1.560	8.870	7.410	22.110	1.740		48.93		74.7	44.2	0.44	4.34	139.3	16.14	6.0	5.00	133	11.68	6.12	0.76	265
female	0	2	2	37	0	4.75	47.4	1.020	0.864	11.440	24.560	8.400	28.440	11.410	25.83	47.24	73.9	44.1	1.09	3.81	139.9	20.51	5.3	4.83	136	11.21	5.56	0.89	314
female	0	2	2	47	0	3.95	56.6	1.025	0.965	7.160	2.800	5.130	1.420	12.110	36.02	42.40	73.9	42.4	0.47	4.13	140.7	19.73	6.6	4.37	129	5.03	3.34	1.92	292
female	0	2	2	47	0	5.40	56.0	1.025	0.625	9.370	12.110	5.110	0.695	12.660	37.05	35.10	71.3	45.6	0.81	4.19	139.0	15.09	5.7	3.96	124	6.67	1.67	0.89	235
female	0	2	2	49	0	4.10	47.0	1.015	1.220	9.550	20.300	6.090	1.190	9.460	41.91	38.31	73.9	45.2	0.67	4.16	141.0	13.96	5.4	4.50	139	1.67	12.23	0.25	226
female	0	2	2	46	0	3.39	52.1	1.010	1.570	14.540	19.940	15.160	3.580	8.260	41.82	25.29	76.2	51.5	0.64	4.05	140.3	16.05	6.0	4.37	141	23.91	24.46	0.51	255
female	0	2	2	48	0	4.80	52.0	1.010	0.238	8.050	3.600	4.160	4.790	11.800	34.81	23.26	70.7	47.8	0.14	4.50	142.1	16.90	3.3	4.62	128	18.35	5.00	0.51	222
female	0	2	2	33	0	5.27	62.0	1.020	0.950	19.810	21.370	4.950	6.550		29.76		76.1	45.0	0.81	4.06	137.9	18.66	9.1	4.19	114	16.68	27.80	0.12	349
female	0	2	2	34	0	3.50	42.0	1.010	1.060	20.440	13.460	10.080	0.991		40.16		79.6	47.3	0.69	4.16	140.2	17.16	7.3	5.42	153	1.67	2.78	0.00	289
female	0	2	2	43	0	7.13	55.0	1.015	1.520	16.090	9.240	15.590	1.290	13.000	42.33	46.04	80.4	48.5	0.71	3.82	140.1	12.42	6.15	5.15	122	1.66	0.15	0.40	275
female	0	2	2	44	0	3.22	65.0	1.015	1.010	10.250	8.800	5.540	0.559	12.190	38.99	42.66	76.5	44.9	0.61	3.77	137.9	12.87	8.0	4.42	136	6.67	5.56	1.15	256
female	0	2	2	38	0	4.17	58.3	1.020	1.640	14.340	12.050	37.270	0.794	10.350	40.34	31.22	80.7	46.9	1.07	4.16	137.2	14.06	8.0	4.69	142	10.56	65.61	0.89	331
female	0	2	2	41	0	3.60	44.0	1.010	1.350	9.730	4.830	0.600	0.610	8.110	46.84	30.47	70.0	47.1	0.70	3.85	140.0	16.05	5.3	4.33	127	17.79	3.34	1.02	204
female	0	2	2	31	0	5.20	51.0	1.025	1.030			8.650			26.32		79.9	45.1	0.46	4.24	140.0	14.74	6.7	4.26	127	11.50	15.57	1.92	226
female	0	2	2	37	0	4.80	61.0	1.020	0.752	9.100	9.800	8.840	5.420	10.450	56.73	32.51	77.4	49.6	0.83	4.41	139.0	17.61	7.1	4.64	138	7.23	11.68	0.64	182
female	0	2	2	49	0	3.50	62.0	1.025	0.735	16.130	9.060	8.180	0.887	6.560	52.07	39.88	70.9	49.5	0.59	3.98	141.1	17.08	4.7	4.37	133	8.34	6.67	1.92	200
female	0	2	2	34	0	2.90	58.0	1.030	1.230	11.080	3.720	22.630	2.070	7.930	39.12	45.08	70.2	47.8	0.47	4.00	140.0	14.10	4.9	3.96	127	23.35	60.05	0.52	202
female	0	2	2	36	0	4.80	57.0	1.005	0.378	8.960	5.930	6.370	0.750	11.660	49.99	40.28	71.1	49.6	0.37	4.30	138.6	14.10	5.5	4.50	132	8.34	5.56	1.02	213
female	0	2	2	36	0	4.74	41.8	1.025	0.674	6.670	5.650	11.080	4.560	8.800	44.09	36.77	67.9	44.8	0.71	4.01	139.6	14.71	4.0	4.05	132	4.45	4.45	0.25	211
female	0	2	2	36	0	3.90	49.0	1.005	1.010	38.800	8.510	23.580	1.540	10.540	40.90	34.22	74.8	47.6	0.55	4.20	141.0	13.50	6.7	4.29	136	17.79	4.45	0.51	233
female	0	2	2	50	0	8.10	71.0	1.015	0.946	15.900	6.640	9.610	3.630	13.770	34.97	39.85	73.6	46.4	0.60	4.11	142.0	15.21	4.6	3.84	120	21.13	6.12	0.89	293
female	0	2	2	40	0	3.20	51.0	1.015	1.520	11.750	8.530	20.030	2.020	8.510	49.40	29.89	71.6	47.8	0.72	3.79	139.4	15.89	4.5	4.12	120	1.11	4.14	0.15	175
female	0	2	2	34	0	4.87	60.1	1.015	0.885	13.120	10.560	6.550	1.770		35.14	39.93	74.2	47.9	0.60	4.18	139.0	17.38	4.0	5.06	149	3.34	5.12	0.40	158
female	0	2	2	41	0	4.90	69.0	1.005	1.030	14.610			1.030		40.28		71.0	45.9	0.54	4.09	140.1	10.49	6.3	4.23	122	0.56	0.56	0.12	280
female	0	2	2	44	0	7.90	65.0	0.014	0.653	18.340	9.220	9.890	0.792	8.790	59.09	42.56	76.0	51.1	0.72	5.18	140.0	14.38	5.2	4.86	137	0.12	0.40	0.25	239
female	0	2	2	47	0	4.50	66.0	1.025	2.170	8.870	16.650	18.190	0.893	8.770	48.83	35.57	74.7	45.1	0.45	4.03	144.5	17.73	5.4	4.50	120	0.56	1.67	0.25	153
female	0	2	2	37	0	4.10	51.0	1.010	1.640	19.760	7.730	0.971	13.870	12.290	28.21	42.85	70.2	50.1	0.85	4.21	140.5	17.71	7.7	4.67	133	11.68	3.34	0.69	232
female	0	2	2	45	0	2.90	57.0	1.005	1.850	13.440	5.300	20.780	1.410	14.630	36.88	41.94	75.8	44.1	1.02	3.95	139.0	17.95	8.0	4.15	125	75.62	9.45	0.25	310
female	0	2	2	49	0	5.30	52.0	1.025	1.450	30.280	20.360	11.400	1.040	10.830	52.24	39.30	79.3	52.3	0.68	4.49	136.4	17.79	5.2	4.96	140	11.12	1.11	0.38	268
female	0	2	2	40	0	3.60	64.7	1.005	1.510	14.610	10.130	7.850	1.800	8.700	46.74	36.77	72.7	47.7	0.52	4.28	139.5	14.58	7.5	5.12	135	0.56	1.67	0.89	255
female	0	2	2	38	0	4.00	53.0	1.015	1.650	8.130	7.590	13.050	0.780	9.750	40.67	40.26	82.0	48.4	0.42	4.17	139.0	11.77	4.7	4.44	134	2.11	1.22	0.12	269
female	0	2	2	42	0	5.50	57.0	1.020	1.280	13.210	6.350	8.270	5.890		49.67	46.57	71.5	49.1	0.67	4.13	143.0	17.83	6.0	4.49	138	10.56	33.36	0.69	179
female	0	2	2	42	0	5.10	62.0	1.020	1.150	10.530	9.330	10.350	4.080	10.050	38.76	50.50	70.4	45.0	0.70	4.50	140.0	17.70	6.7	4.40	129	12.23	11.68	1.79	254
female	0	2	2	39	0	3.20	50.0	1.015	0.324	9.700	6.370	5.990	20.410	15.630	29.56	28.84	72.1	46.6	0.92	4.24	142.0	19.34	5.2	3.94	119	8.12	0.56		304
female	0	2	2	46	0	5.10	64.0	1.030	1.060	10.620	15.200	10.220	38.640	10.990	41.85	51.04	72.4	47.3	0.67	4.38	138.0	17.28	5.3	3.89	124	1.67	3.34	0.25	322
female	0	2	2	39	0	4.90	55.0	1.015	0.667	24.810	16.890	38.430	0.802	11.140	33.62	41.59	72.3	46.7	0.68	4.66	141.0	14.96	7.1	4.68	150	6.67	20.57	1.91	264
female	0	2	2	46	0	6.13	40.2	1.020	2.050	12.450	6.720	9.140	11.360	12.050	49.04	41.80	72.7	48.8	0.70	4.50	139.3	20.40	5.6	5.01	145	0.55	2.12	0.11	282
female	0	2	2	44	0	6.60	69.0	1.015	0.633	20.690	12.040	17.020	2.750	11.170	29.31	32.15	72.3	49.4	0.94	4.93	141.2	18.83	7.0	4.74	130				283
female	0	2	2	43	0	4.70	54.0	1.010	1.200	6.980	6.080	10.700	2.100	10.800	50.93	32.19	72.8	43.1	0.86	4.45	141.0	17.55	7.0	4.28	123	3.55	1.18	0.40	348
female	0	2	2	48	0	4.90	52.0	1.015	1.540	9.660	9.600	4.760	3.970	13.210	34.56	27.84	80.0	49.0	0.57	4.71	142.1	16.61	6.7	4.69	147	2.12	0.88	0.12	308
female	0	2	2	48	0	4.90	61.0	1.015	0.510	15.400	4.310	7.260	2.070	11.300	32.98	43.15	74.3	46.0	0.93	4.16	143.0	13.36	5.9	4.43	125	2.78	6.67	0.12	207
female	0	2	2	46	0	5.60	73.0	1.025	1.970	35.370	9.380	29.920	10.730	12.150	50.37	43.80	71.1	44.6	0.56	4.14	141.0	15.04	6.1	4.27	125	18.90	6.67	0.72	332
female	0	2	2	38	0	5.20	45.0	1.010	1.090	14.780	7.760	11.770	0.783	16.540	45.94	34.70	83.0	48.1	0.73	4.20	138.0	11.90	9.5	4.71	115	2.78	4.45	0.25	311
female	0	2	2	44	0	3.88	55.0	1.010						10.290	49.61		72.2	46.6	0.51	4.14	139.0	15.74	4.8	4.49	140	2.10	0.22	0.12	269
female	0	2	2	37	0	4.06	59.0	1.010	0.921	19.250	10.890	12.760	103.500		37.91		72.2	43.0	0.51	3.63	138.5	17.73	6.1	4.72	134	3.12	0.85	0.11	234
female	0	2	2	47	0	5.00	66.0	1.025	1.670	24.070	5.350	20.040	1.050	10.030	37.75	36.91	76.7	43.7	0.47	4.51	140.0	15.71	4.8	4.43	120	15.01	23.35	1.28	281
female	0	2	2	43	0	4.90	53.0	1.025	1.380	13.320	21.930	10.610	1.200	14.170	37.56	29.71	81.4	48.2	0.68	4.31	140.0	16.51	6.5	4.77	134	2.22	8.90	0.82	255
female	0	2	2	34	0	4.30	65.0	1.015	0.565	13.790	11.970	12.020	0.837		41.30		70.3	46.2	0.82	3.97	140.3	13.47	6.7	4.31	120	2.22	1.67	0.00	257
female	0	2	2	39	0	3.38	60.6	1.020	2.670	13.920	8.130	1.210	1.010	9.030	34.66	41.53	67.5	46.7	0.55	4.20	138.8	15.50	5.5	4.47	145	16.68	55.60	0.51	215
female	0	2	2	38	0	3.70	59.0	1.030	2.180	19.870	13.710	17.430	3.980	9.050	28.57	37.21	70.6	45.9	0.88	4.13	139.0	13.23	7.5	4.69	136	8.34	2.22	0.12	150
female	0	2	2	35	0	3.02	51.8	1.015	0.607	12.510	12.380	5.980	1.480	7.150	29.49	62.70	73.6	45.9	0.45	4.57	141.5	17.37	4.9	3.97	120	1.11	5.00	0.12	225
female	0	2	2	29	0	3.20	51.0	1.020	0.883	13.240	7.050	5.400	13.910	6.500	32.32	40.83	76.4	44.8	0.68	4.44	141.0	15.74	7.9	4.24	132	17.79	8.90	0.69	199
female	0	2	2	44	0	3.50	53.0	1.015	1.300	18.980	10.640	8.070	16.580	11.070	23.23	39.01	75.7	46.8	0.77	4.31	141.0	12.11	5.1	4.57	141	10.01	2.22	0.38	211
female	0	2	2	43	0	2.90	50.0	1.025	2.000	12.500	13.230	22.950	1.880	13.740	39.36	42.39	73.3	45.7	0.49	3.51	139.0	15.31	8.8	4.18	127	11.12	5.00	0.89	274
female	0	2	2	35	0	3.67	62.9	1.020	1.040	11.100	5.130	9.190	0.551	7.330	40.88	32.07	76.6	46.7	0.85	4.09	138.2	15.89	8.1	4.49	135	0.56	1.67	0.00	241
female	0	2	2	49	0	2.86	56.2	1.015	0.298	10.560	7.650	12.510	1.120	6.800	37.37	38.65	68.3	40.0	0.18	3.58	140.6	17.08	6.3	3.91	120	1.67	2.78	0.00	180
female	0	2	2	44	0	3.60	59.8	1.010	1.780	18.230	6.300	11.290	4.290	14.170	58.26	44.56	77.0	44.8	0.69	4.34	138.2	22.64	5.3	5.04	145	0.56	1.11	0.00	312
female	0	2	2	46	0	3.48	68.0	1.020	2.120	12.310	23.400	6.340	1.130	10.980	50.94		80.5	44.6	0.67	3.97	138.8	14.37	6.3	5.21	145	0.96	1.68	0.11	255
female	0	2	2	46	0	5.40	61.0	1.025	1.270	43.590	13.530	34.520	0.788	9.930	47.74	32.20	73.6	44.9	0.57	4.46	140.0	18.26	6.0	4.36	138	10.01	3.34	0.25	259
female	0	2	2	34	0	3.60	54.0	1.020	0.782	11.860	11.010	5.560	0.543	12.050	28.04	34.54	75.0	47.0	0.81	4.34	140.0	12.14	5.7	4.41	141	16.68	27.80	1.15	294
female	0	2	2	28	0	5.33	38.2	1.005	1.020	14.630	8.590	4.740		8.620	43.18		73.9	51.4	0.57	4.36	139.2	18.36	8.1	4.89	140				271
female	0	2	2	32	0	5.10	65.0	1.015	0.813	15.030	11.310	6.450	0.813	11.100	57.41	37.36	69.2	44.8	0.58	3.94	137.0	13.54	9.1	4.40	129	1.22	1.22	0.12	209
female	0	2	2	48	0	4.58	70.8	1.025	1.790	10.430	5.900	5.100	6.530	9.320	62.15	73.15	67.5	48.0	0.54	4.07	138.2	14.77	6.8	4.81	143	2.12	2.05	0.56	323
female	0	2	2	31	0	5.71	67.7	1.025		19.730					31.43		78.9	46.8	1.46	4.05	142.0	15.05	6.0	5.04	145	22.80	11.12	1.28	258
female	0	2	2	48	0	4.30	57.0	1.025	0.907	10.850	7.960	14.950	5.160	11.920	51.24	42.43	68.6	45.9	0.48	3.42	135.8	14.92	4.8	4.39	133	2.22	21.13	1.15	244
female	0	2	2	44	0	5.20	60.0	1.015	1.900	14.330	7.120	6.020	3.100	13.510	53.02	56.81	68.1	43.9	0.63	4.00	137.0	12.20	6.4	4.55	132	0.15	1.22	0.11	274
female	0	2	2	43	0	3.30	52.0	1.020	1.740	7.290	4.360	22.790	0.732	10.670	38.34	52.16	65.9	49.3	0.43	3.59	142.0	14.59	6.78	5.12	125	1.22	1.85	0.15	255
female	0	2	2	39	0	4.43	48.0	1.015	0.654	7.440	12.720	1.510	0.513	7.080	27.92	33.18	69.4	43.3	0.62	3.89	138.3	16.29	7.1	3.86	122	6.67	1.67	0.12	190
female	0	2	2	41	0	4.10	66.0		3.170	16.540	8.110	31.670	1.740	8.920	33.97	49.18	78.9	50.3	0.32	4.08	141.0	16.58	7.8	4.04	124				323
female	0	2	2	39	0	3.20	38.0	1.005	0.857	16.100	17.540	12.130	4.350	10.000	40.99	35.95	73.8	49.7	0.52	4.05	140.1	15.35	9.1	4.57	134	7.78	0.56	0.00	257
female	0	2	2	36	0	6.10	52.0	1.025	1.630	13.480	13.570	14.410	1.300	8.200	30.54	36.62	73.2	51.9	0.62	3.98	141.2	17.28	7.1	3.75	121	11.68	3.89	0.12	254
female	0	2	2	36	0	4.70	44.0	1.020	2.270	15.510	6.230	21.510	1.440	8.630	28.30	40.93	68.9	47.0	0.78	3.91	141.0	19.41	5.5	4.33	118	4.45	12.30	0.92	249
female	0	2	2	44	0	3.20	64.0	1.025	1.150	6.960	17.930	6.700	1.070	9.320	32.52	33.35	74.5	42.9	1.14	3.82	139.0	17.22	5.9	4.17	125	1.67	12.88	0.63	257
female	0	2	2	34	0	2.36	43.1	1.005	2.270	17.490	14.990	25.780	1.280	6.830	35.49	40.94	67.6	45.1	0.75	4.07	138.5	10.37	5.0	4.21	130	16.68	4.49	0.12	208
female	0	2	2	35	0	4.40	73.0	1.020	1.370	9.440	15.760	13.500	0.776	21.310	49.07	63.56	71.2	47.3	0.42	4.04	141.0	15.84	5.8	4.84	123	9.45	8.90	0.69	214
female	0	2	2	48	0	3.90	56.0	1.020	1.040	8.960	7.710	9.520	10.360	8.970	57.15	41.78	71.0	45.9	0.71	4.94	140.9	12.14	5.1	4.14	138	6.5	0.8	0.15	222
female	0	2	2	40	0	4.10	48.0	1.025							35.37	24.84	78.1	45.0	0.63	4.33	140.4	18.93	4.85	5.12	125	6.67	3.89	0.12
female	0	2	2	38	0	4.60	52.0	1.020	0.705	21.850	5.030	6.280	8.940	10.580	35.15	30.64	73.3	48.4	0.82	4.86	140.4	16.26	5.3	4.50	139	4.45	10.01	0.38	318
female	0	2	2	31	0	4.70	56.0	1.005	2.020	11.390	2.970	13.110	1.710	13.800	40.46	41.66	75.5	47.9	0.62	4.52	143.0	18.62	9.3	4.92	145	12.79	6.67	0.38	319
female	0	2	2	50	0	5.6	80.5	1.015	1.750	10.530	13.740	12.830	0.896		55.09		69.0	47.5	1.2	4.32	142.6	17.58	4.85	4.95	125	6.58	1.58	0.12
female	0	2	2	35	0	3.60	58.0	1.015	0.275	8.510	10.480	7.860	29.960	11.030	32.33	52.71	71.2	48.2	0.54	4.20	138.7	15.00	4.5	4.17	127				223
female	0	2	2	29	0	4.10	53.0	1.020	2.050	12.690	6.400	34.610	1.130	12.320	55.33	48.62	78.1	49.0	0.43	4.40	143.9	13.50	5.9	4.58	131	3.89	1.67	0.00	195
female	0	2	2	33	0	4.50	63.0	1.015	5.500	20.010	10.010	11.940	5.610	7.620	34.19	33.51	72.2	45.3	0.77	4.05	142.6	18.15	4.3	4.36	132	0.56	0.45	0.72	249
female	0	2	2	49	0	5.10	57.0	1.010	0.849	13.180	6.490	8.330	1.460	22.970	36.48	32.05	76.2	50.8	0.53	4.34	141.0	15.44	6.8	5.08	147	0.61	0.40	1.12	239
female	0	2	2	47	0	6.20	57.0	1.005	1.760	8.980	6.870	6.460	1.300	11.490	36.43	38.31	72.0	47.4	0.62	3.90	141.0	12.90	3.8	4.23	132	0.56	0.56	0.00	225
female	0	2	2	23	0	3.90	70.0	1.010	0.772	14.380	8.780	3.480		10.190	67.92		78.5	46.1	0.48	3.93	138.0	16.23	5.5	4.49	132	2.22	237.41	0.25	250
female	0	2	2	46	0	4.00	53.0	1.010		16.830	10.010		7.460	7.200	43.60	41.23	73.0	48.1	0.57	3.87	139.8	13.37	5.4	4.63	136	0.51	1.11	0.00	184
female	0	2	2	44	0	4.66	62.0	1.020	2.160	27.910	15.100	41.870	1.010	11.580	41.29	52.06	73.6	47.5	0.78	4.89	140.3	15.89	6.5	5.11	135	0.15	1.11	0.12	255
female	0	2	2	33	0	2.70	41.0	1.010	1.400	43.310	6.720	0.600	2.320	12.230	30.33	36.07	71.0	46.2	0.45	4.04	140.0	18.24	6.0	4.76	127	2.78	5.00	0.00	262
female	0	2	2	49	0	4.70	52.0	1.015	1.580	15.160	15.440	8.700	6.920	14.070	49.39	37.18	71.9	50.8	0.90	4.15	141.3	16.25	7.5	4.56	130	0.78	0.15	0.40	266
female	0	2	2	45	0	5.00	55.0	1.005	1.580	12.260	8.160	31.340	1.270	10.860	33.88	47.86	68.5	45.4	0.79	4.19	140.0	18.39	7.5	4.77	131	5.00	9.58	0.76	325
female	0	2	2	46	0	4.00	52.0	1.010	1.430	20.940	8.630	11.170	1.090	12.110	47.49	43.77	76.6	47.9	0.68	4.25	141.0	18.45	5.0	4.81	140	11.12	3.37	0.69	329
female	0	2	2	27	0	4.16	46.6	1.020	2.490	12.700	4.960	6.210		8.110	50.69		69.3	50.5	0.55	3.98	137.2	16.48	5.5	4.42	136	2.22	3.34	0.38	171
female	0	2	2	39	0	3.50	58.0	1.015	2.070	20.080	17.240	11.070	19.210	10.360	32.79	32.97	79.1	49.1	1.05	4.30	141.0	20.70	6.5	4.14	149	5.00	2.78	0.25	290
female	0	2	2	36	0	2.80	49.0	1.010	0.821	11.480	11.790	6.510	1.720	10.280	37.08	44.83	71.2	47.0	0.63	4.26	140.6	17.16	7.7	4.47	142	2.22	0.56	0.00	426
female	0	2	2	48	0	5.40	65.0	1.025	1.040	7.390	14.240	4.750	2.560	10.480	30.59	28.59	78.2	51.6	0.41	3.80	140.0	18.40	6.9	4.06	124	1.11	2.78	1.53	273
female	0	2	2	49	0	4.00	43.0	1.010	1.030	6.480	2.840	3.240	5.310	14.060	36.22	30.72	70.2	51.0	0.65	4.58	141.2	15.78	4.6	4.22	123	10.03	2.78	0.38	335
female	0	2	2	49	0	5.60	46.0	1.010	<0.200	9.710	4.780	9.680	1.080	13.550	64.14	37.67	66.9	44.9	0.50	3.93	142.0	13.23	3.6	4.42	129	0.56	2.22	0.00	212
female	0	2	2	44	0	3.15	50.7	1.005	0.559	23.680	8.420	14.610	0.765	10.680	38.20	49.42	70.2	42.3	0.48	4.14	138.6	18.34	7.9	5.24	122	10.56	15.01	0.89	288

## Sheet: CKD patients
group	sex	age	stage	BUN	Cr	Urine Specific Gravity	CEA	CA125	CA15-3	CA19-9	CA72-4	NSE	proGRP	HE4	NGAL
1	2	71	1	6.64	60.4	1.005	0.865	6.260	7.580	5.010	1.250	10.700	67.55	79.93
1	1	59	1	13.25	170.2	1.005	4.08						107.1	399.4
1	2	48	1	3.2	52	1.015	3.57						44.36	57.42
1	1	59	1	4.84	58.0	1.020	3.360			7.390	2.530	14.190	42.42
1	1	45	1	3.80	62.0	1.010	1.180			3.270	177.400	12.740	28.20		115.60
1	1	23	1	6.70	73.0	1.005	3.590			6.700	2.090	11.900	40.03
1	1	54	1	5.55	75.2	1.010	2.480			13.440	1.450	23.530	61.60		209.30
1	1	56	1	5.76	68	1.025	2.89						63.74
1	1	58	1	5.2	67	1.005	2.08						87.08
1	1	28	1	3.96	67.8	1.025	2.04						34.96
1	1	67	1	25.49	382	1.005	9.42						201.4
1	1	56	1	3.5	102	1.005	1.52						91.6
1	1	26	1	4.1	65	1.020	1.5						26.83
1	1	59	1	6.68	138	1.015	2.45						99.78
1	1	82	1	7.05	133.7	1.02	3.57						22.31
1	1	65	1	28.7	274	1.015	0.898						47.52
1	1	46	1	5.6	94	1.02	2.45						175.1
1	1	65	1	41.5	318	1.015	2.36						254.5
1	1	73	1	13.4	183	1.005	3.67						74.72
1	1	19	1	13.50	82	1.005	2.85						64.29
1	1	44	1	5.3	63	1.025	4.77						35.87
1	1	28	1	3.96	61.2	1.00	2.04						34.96
1	2	62	1	4.90	54.0	1.005	5.730	12.200	9.960	13.210	4.470		69.75	38.95
1	2	64	1	6.40	58.0	1.015	2.800	10.750	9.170	12.280	1.000		38.21	74.18
1	2	69	1	4.60	37.0	1.010	2.440	13.140	19.550	12.470	1.490		33.09	76.95
1	2	50	1	3.19	61.3	1.010	1.350	10.340	14.620	6.950	0.746		27.25	88.55
1	1	18	1	5.00	66.5	1.015	2.850			0.775	0.831		45.22
1	1	57	1	4.20	56.0	1.010	2.520			10.530	3.120		46.81
1	1	65	1	5.50	54.0	1.020	2.590			30.620	0.874		21.52		222.40
1	1	26	1	4.10	65.0	1.015	1.500			4.650	0.901		26.83		108.10
1	1	41	1	8.20	59.0	1.005	1.010			7.760	2.880		59.94
1	1	41	1	9.40	72.0	1.015	2.930			31.510	9.810		38.81
1	1	80	1	4.80	54.0	1.005	2.670			9.280	5.950		45.68
1	1	42	1	7.30	57.0	1.015	8.010			7.030	0.757		77.21
1	1	34	1	5.70	43.0	1.010	2.180			9.790	32.180		64.09		330.00
1	1	55	1	5.70	79.0	1.005	4.980			21.260	6.200		48.59		63.07
1	1	66	1	9.20	60.0	1.015	3.370			25.280	1.440		71.07		235.30
1	2	50	1	6.61	60.0	1.025	4.070	43.850	11.330	1.140	0.801
1	2	51	2	4.50	75.0	1.025	1.520	8.090	16.220	18.600	3.630	9.650	50.89	77.18	98.59
1	2	70	2	6.23	94.5		3.580	11.330	18.740	0.600	0.956	17.650	53.61	84.20
1	2	62	2	2.22	768	1.005	0.605						42.94	230.5
1	2	42	2	4.1	238	1.02	2.09						193.8	273.8
1	2	59	2	17.8	373	1.025	1.85						95.83	309.2
1	2	46	2	6.2	119	1.020	2						93.74	377
1	2	27	2	3.7	64	1.025	1.03						44.54	46.11
1	1	75	2	7.30	79.0	1.010	2.400			20.610	5.990	13.850	110.30		114.00
1	1	47	2	5.03	81.0	>=1.030	1.430			11.890	0.899	9.530	55.84		31.59
1	1	65	2	7.30	106.0	1.010	5.010			7.180	1.590	10.070	49.34		209.20
1	1	81	2	6.90	95.0	1.015	8.340			37.870	15.150	26.320	64.38
1	1	29	2	5.80	59.0	1.030	3.330			12.570	4.610	15.230	52.58		231.40
1	1	79	2	4.8	126	1.015	7.22						66.06
1	2	69	2	5.30	76.0	1.025	1.800	10.200	10.780	4.900	1.380		68.28	42.86
1	2	27	2	4.60	67.0	1.025	1.030	5.570	9.610	12.660	1.020		44.54	46.11
1	2	60	2	3.90	75.0	1.015	1.440	15.940	24.360	15.690	4.290		55.04	47.84	68.39
1	2	55	2	6.70	66.0	1.030	3.960	11.200	4.360	8.500	1.690		52.24	48.00
1	2	56	2	4.80	72.0	1.025	1.280	16.710	6.110	1.590	1.040		57.84	79.39
1	2	72	2	7.10	76.0	1.030	0.466	81.170	5.590	18.040	0.902		53.94	82.98
1	2	28	2	5.60	79.0	1.010	1.450	11.910	6.800	6.420	2.490		62.69	97.32
1	2	42	2	6.65	83.1	1.015	3.100	94.970	42.600	27.500	16.570		70.75	158.20
1	1	87	2	8.80	107.0	1.015	2.780			0.716	6.680		53.04		159.50
1	1	56	2	3.50	102.0	1.025	1.520			5.840	0.894		91.60
1	1	63	2	6.70	97.0	1.005	3.360			19.350	3.720		61.84
1	1	70	2	5.60	105.0	1.020	6.110						124.40
1	1	41	2	4.60	93.3	1.005	1.980			3.810	254.500		45.50
1	1	63	2	6.70	104.0	1.010	1.660			7.730	8.000		36.90
1	1	51	2	4.30	94.0		2.140			4.090	0.976		10.33
1	1	46	2	5.60	94.0	1.015	2.850			16.930	0.972		47.52		122.40
1	1	66	2	6.20	112.0		5.780			109.100	1.520		45.91
1	1	62	2	7.80	103.0	1.015	6.280			41.650	1.570		44.43		109.80
1	1	55	2	5.10	83.0	1.025	1.920			9.330	0.865		71.46
1	1	84	2	3.90	79.0	1.015	2.300			7.620	0.875		201.30		171.10
1	1	57	2	6.94	90.9	1.014							82.79
1	1	62	2	9.40	93.0	1.020	4.130			14.090	36.870		35.21
1	1	39	2	5.50	118.0	1.010	2.630			9.820	1.340		66.79
1	2	55	3	9.00	139.0	1.010	3.820	44.350	23.010	120.300	1.130	14.750	55.12	504.60	194.90
1	2	86	3	7.60	153.0	1.010	2.110	23.540	23.200	15.610	0.878	9.650	111.10	635.50
1	1	72	3	11.47	181.7					130.100			261.90
1	1	29	3	8.00	151.0	1.020	2.450			36.860	0.739	14.900	73.31		166.70
1	1	57	3	7.88	130.8	1.02	5.76						62.2
1	1	67	3	3.3	146	1.005	4.9						69.33
1	1	59	3	13.25	170.5	1.010	4.08						74.72
1	1	74	3	8	133	1.015	2.03						109.8
1	2	44	3	5.00	99.0	1.005	0.366	14.770	8.420	11.540	2.360		60.20	97.71
1	2	76	3	5.70	88.0	1.015	2.780	18.120	37.180	11.990	3.130		87.90	114.90	96.57
1	2	70	3	8.80	104.0	1.010	2.230	19.020	9.460	10.550	1.780		73.70	141.00	150.70
1	2	75	3	9.70	142.0	1.010	5.220	13.470	8.540	1.200	1.110		59.75	160.80
1	2	65	3	9.80	133.0		1.380	10.210	4.650	6.630	1.860		107.00	163.70
1	2	55	3	10.24	94.7	1.017	0.748	23.430	12.160	9.200	3.670		74.53	187.00
1	2	73	3	6.50	91.0	1.005	3.140	93.280	15.160	8.630	3.770		92.12	242.30	171.00
1	2	42	3	6.90	156.0	1.005	2.090	11.750	9.730	14.570	14.300		88.31	273.80	244.60
1	2	46	3	11.70	143.0	1.010	2.000	134.100	8.260	<0.600	0.782		93.74	377.00
1	2	47	3	8.60	169.0	1.005	3.190	25.230	31.040	13.260	0.762		57.52	783.80
1	2	49	3	30.69	822.0		3.000	241.200	16.700	233.700	14.660		146.90	>1500
1	1	47	3	8.00	147.0	1.005	0.878			6.400	3.620		95.04
1	1	58	3	10.40	160.0	1.015	2.450			38.720	0.980		95.83
1	1	55	3	7.20	129.0	1.015	10.820			71.620	4.100		88.26		237.80
1	1	66	3	8.40	156.0	1.005	1.550			9.570	3.350		64.73
1	1	66	3	6.70	154.0	1.015	1.770			7.580	0.980		56.09
1	1	55	3	11.10	156.0	1.015	3.310			5.520	2.230		47.52		191.70
1	1	64	3	9.60	100.0	1.005	7.400			3.040	1.460		106.30		129.80
1	1	60	3	4.50	115.0	1.015	3.680			37.820	2.510		64.15
1	1	72	3			1.020	0.655			9.050	0.721		68.58
1	1	59	3	11.90	174.0	1.015					63.760		93.65
1	1	79	3	4.80	126.0	1.015	7.220			0.600	1.450		99.78
1	1	82	3	7.05	133.7	1.010	3.570			18.190	1.370		66.06
1	1	57	3	6.65	128		3.060			37.970	1.290		55.43
1	1	44	3	9.30	130.0	1.005	3.660			8.740	0.825		68.02
1	1	53	3	30.20	751.0	1.005	4.090			0.600	5.010		344.90
1	1	51	3	8.60	178.0	1.015	3.680			12.570	3.030		87.14
1	1	44	3	9.80	119.0	1.005	1.580			9.820	2.100		90.38
1	1	52	3	7.80	155.0	1.005	4.280			357.500	0.821		136.20		148.40
1	2	66	3	9.60	133.0	1.005							188.30
1	2	59	4	18.1	359		1.710	10.090	4.950	<0.600	5.190	15.190	249.00	305.90
1	2	70	4	13.85	256.2	1.010	5.29						87.15	1500
1	2	42	4	10.49	198	1.015	3.62						91.74	201.30
1	1	77	4	24.48	485.7	>=1.030	9.890			59.720	0.877	21.920	220.00		340.10
1	1	70	4	24.11	353.6	1.015	2.630			7.280	7.060	12.360	173.80		202.40
1	1	57	4	12.35	361.0	1.015	2.100			0.600	1.070	15.800	148.80
1	1	55	4	11.18	184.0	1.010	2.770			9.310	0.786	11.720	90.85		349.70
1	1	67	4	10.34	329.2	1.01	4.43						186.40
1	1	70	4	10.16	213.9	1.015	6.08						146.40
1	2	56	4	12.89	253.9		1.880	9.670	13.200	7.500	1.300		72.20	195.80
1	2	31	4	10.10	201.0	1.005	2.110	77.160	10.010	23.030	2.170		107.10	399.40	249.10
1	2	44	4	10.47	419.7	1.005	2.300	144.400	12.610	37.280	0.867		254.10	469.70	335.00
1	1	68	4	13.10	215.0		1.360			13.790	2.420		69.10		123.40
1	1	25	4	12.54	343.0	1.005	1.640			5.890	10.980		95.55
1	1	65	4	15.20	273.0	1.005	2.360			20.830	1.610		175.10
1	1	73	4	13.10	183.0			150.500		85.010			254.50
1	1	65	4	22.20	220.0	1.005	0.898			5.820	0.649		193.00
1	1	59	4	18.20	376.0	1.010	4.630			26.600	1.750		135.50
1	1	66	4	15.90	367.0	1.010	2.240			0.600	1.370		192.70		186.00
1	1	89	4	11.40	282.0	1.010	2.970			11.560	0.705		60.16
1	1	50	4	14.50	278.0	1.010	2.070			26.020	0.724		114.80
1	1	62	4	12.20	277.0	1.015	7.200			59.740	1.220		97.68
1	2	47	5	17.10	318.0		2.290	91.770	13.480	14.870	0.602	18.830	185.10	620.60
1	1	67	5	22.96	357.1	1.025	7.940			29.170	0.614	15.540	161.00
1	1	65	5	19.44	734.2		0.336	15.000		1.400	0.882	23.150	189.50
1	1	36	5	23.76	865.0	1.005	1.640			11.500	0.957	15.110	255.70
1	1	63	5	10.77	523.0	1.010	1.650			8.320	1.880	10.660	202.20		315.80
1	1	83	5	17.28	513.2	1.015	3.990			30.860	0.662	22.030	245.00
1	1	64	5	35.20	528.0	1.015	4.030			147.700	1.510	10.380	169.10		221.90
1	1	44	5	31.30	484.0	1.015	3.840			21.690	0.924	15.490	293.80
1	1	53	5	11.03	284.1	1.015	2.83				55.54	17.68	140.0
1	1	46	5	16.27	870	1.010	2.42						181.50
1	1	65	5	20.83	451.3	1.010	3.14						195
1	2	58	5	28.92	1398.0	1.010	0.925	41.820	18.620	21.070	2.390		72.06	237.70
1	2	59	5	13.70	352.0		1.850	11.480	6.310	<0.600	2.660		253.40	309.20
1	2	72	5	14.00	336.0	1.005	1.810	17.000	16.840	10.460	1.730		73.75	416.50
1	2	43	5	14.90	480.0	1.005	1.670	6.100	9.730	13.060	2.460		126.70	478.90
1	2	47	5	25.00	439.0	1.005	2.250	34.320	18.230	37.490	1.010		192.60	522.80
1	2	66	5	11.70	312.0	1.010	3.810	34.130	10.750	368.400	1.340		177.30	612.20
1	2	55	5	15.71	456.1	1.005	1.810	17.030	10.950	23.790	2.260		137.10	630.10
1	2	86	5	10.01	416.5	1.010	3.420	206.700	6.250	26.300	0.806		233.60	800.40
1	2	39	5	41.99	1167.2		3.010	16.340	13.880	13.970	2.610		209.80	1500.00
1	2	70	5	14.18	613.9		3.990	11.660	15.260	28.180	0.772		170.90	>1500	354.30
1	1	71	5	38.58	467.0	1.008	2.130			<0.600	1.780		138.30		314.90
1	1	68	5	31.18	514.0	1.020	15.410			47.050	1.030		216.00
1	1	66	5	8.39	390.1	1.015	2.460			6.340	0.627		199.10
1	1	42	5	11.00	1097.0		2.750			0.600	13.040		271.90
1	1	45	5	31.64	603	1.015	4.840			18.900	0.684		398.70
1	1	34	5	15.50	1231.0		3.010			13.510	0.803		328.00
1	1	42	5	23.40	603	1.005	3.410			30.120	1.150		140.60		289.70
1	1	58	5	8.60	876.0		3.670			19.050	2.550		227.00
1	1	44	5	23.80	633.0	1.005	2.770			43.850	2.960		232.20		407.40
1	1	60	5	24.70	603.0	1.010	6.650			41.260	0.827		155.10
1	1	60	5	23.20	966.0		2.170			29.450	0.862		280.80
1	1	64	5	5.13	258.0		3.840			83.070	1.310		215.10		337.40
1	1	55	5	13.39	725.7		3.680			27.820	0.786		248.00
1	1	60	5	22.57	462.7	1.005	4.600			0.600	0.808		109.70
1	1	67	5	20.23	771.7	1.015	3.570			36.350	1.060		208.30		353.20
1	1	72	5	18.80	413.0	1.010	1.550			8.750	1.110		126.40
1	1	84	5	18.29	384.2	1.005	5.220			10.950	10.090		127.00
